# Supplementary material
Source: HighWire-hosted journal article supplement (https://bmjopen.bmj.com/content/15/2/e088001)
Supplement: inline-supplementary-material-2 [file inline-supplementary-material-2.pdf]

## APPENDICES

### Appendix B. Table of Events and Measures

| Criteria                             | Measure                                                                   | Baseline | 1 to 2-days Prior to Surgery | Discharge Day | 4-weeks Post-op | 8-wks post-op |
|--------------------------------------|---------------------------------------------------------------------------|----------|------------------------------|---------------|-----------------|---------------|
| <b>Informed Consent</b>              |                                                                           | X        |                              |               |                 |               |
| <b>Randomization</b>                 |                                                                           | X        |                              |               |                 |               |
| <b>PROMS<sup>1</sup></b>             |                                                                           |          |                              |               |                 |               |
| Technology Use                       | Survey                                                                    | X        |                              |               |                 |               |
| Frailty                              | EFS-Score <sup>2</sup>                                                    | X        |                              |               |                 | --            |
| HRQOL                                | SF-36 v1                                                                  | X        |                              |               | X               | X             |
| Satisfaction w/ optimization         | Survey                                                                    | --       | X                            |               |                 |               |
| Prehab Adverse Events (AE) Form      |                                                                           |          | X                            |               |                 |               |
| <b>Clinical Status</b>               |                                                                           |          |                              |               |                 |               |
| Health status                        | Comorbid conditions                                                       | X        |                              |               |                 |               |
| Hemoglobin                           |                                                                           | X        |                              |               |                 |               |
| Serum Creatinine                     |                                                                           | X        |                              |               |                 |               |
| Serum Albumin                        |                                                                           | X        |                              |               |                 |               |
| <b>Engagement Metrics</b>            |                                                                           |          |                              |               |                 |               |
| Days to Optimize                     | # Days baseline to surgery date                                           |          | X                            |               |                 |               |
| Optimization Engagement <sup>3</sup> | Proportion of available days logged in Webapp vs. recorded on paper diary |          | X                            |               |                 |               |
| <b>Discharge</b>                     |                                                                           |          |                              |               |                 |               |

<sup>1</sup> PROM – Patient-reported outcome measures

<sup>2</sup> EFS – Edmonton Frailty Scale score – can use either modality of bedside version for in person pre-surgical consult visit with surgeon or can use acute care version for telehealth visit

<sup>3</sup> Optimization engagement is calculated as a proportion (#days engaged in activities / maximum #days eligible to optimize). Usual Care with written materials (UC) participants will be prompted by the onsite Clinical Research Coordinator to return their paper diary. Paper diary metrics will be entered into REDCap database for calculation of their optimization intensity. For the PrehabPal Webapp intervention arm, the engagement metric will be calculated in the Webapp.

| Criteria                    | Measure                             | Baseline | 1 to 2-days Prior to Surgery | Discharge Day | 4-weeks Post-op | 8-wks post-op |
|-----------------------------|-------------------------------------|----------|------------------------------|---------------|-----------------|---------------|
| ASA <sup>4</sup>            |                                     |          |                              | X             |                 |               |
| Length of stay (LOS)        | Time from surgery to discharge date |          |                              | X             |                 |               |
| Surgical Incision           | Open, laparoscopic                  |          |                              | X             |                 |               |
| Type of Surgery             | Pick list of procedure types        |          |                              | X             |                 |               |
| Stoma creation <sup>5</sup> | Yes / No                            |          |                              | X             |                 |               |
| Tumor state                 | Pathology report                    |          |                              |               | X               |               |
| Discharge location          |                                     |          |                              | X             |                 |               |
| 4-Weeks Post-Op             |                                     |          |                              |               |                 |               |
| Post-op complications       | 30-day chart review                 |          |                              |               | X               |               |
| Readmission rate            | 30-day chart review                 |          |                              |               | X               |               |
| ED <sup>6</sup> visit       | 30-day chart review                 |          |                              |               | X               |               |

<sup>4</sup> ASA – American Society of Anesthesiologists Physical Status Classification System  
<sup>5</sup> Stoma creation as recorded on the operative report or discharge summary  
<sup>6</sup> ED is emergency department visit/encounter.
